# Supplementary material for: The unfolded protein response of the endoplasmic reticulum supports mitochondrial biogenesis by buffering nonimported proteins
Source: PubMed Central journal article supplement — Mol Biol Cell. 2023 Aug 17;34(10):ar95. doi: 10.1091/mbc.E23-05-0205 (PMC10551703; doi:10.1091/mbc.e23-05-0205), 2023-08-17
Supplement: mbc-34-ar95-s001.pdf [file mbc-34-ar95-s001.pdf]

Supplementary Materials  
*Molecular Biology of the Cell*  
Knöringer *et al.*

## Supplementary Figures

**Supplementary Figure 1. GO Enrichment Analysis of late changes in the proteome of clogger-expressing cells. (A-B)** Enrichment of GO terms of the “molecular function” category of proteins upregulated ( $\log_2$  fold change larger than 0.5 with adjusted p value of at most 0.05) in cells expressing *b*<sub>2</sub>-DHFR compared to cytosolic DHFR after 4.5 h (A) or 9 h (B) of induction with 0.5% galactose. Proteomics data from (Boos *et al.*, 2019).

**Supplementary Figure 2. Detection of UPR<sup>ER</sup> induction with mass spectrometry and RT-qPCR.** (A) Protein levels in clogger-expressing versus control cells after different times of induction were measured by quantitative mass spectrometry (Boos *et al.*, 2019). Highlighted are proteins which are reported UPR<sup>ER</sup> targets (Schmidt *et al.*, 2019). Data from  $n=3$  independent biological replicates are shown. The data for 18 h are the same as shown in Figure 1E. (B) The change in translational efficiency after 4.5 h clogger expression was calculated for all genes measured in both the RNA-seq(Boos *et al.*, 2019) and Ribo-Seq on clogger-expressing cells by dividing the translome fold change by the transcriptome fold change. (C) Schematic depiction of the primer-probe combinations used to quantify total *HAC1* as well as spliced *HAC1<sup>i</sup>* mRNA levels via RT-qPCR. (D) Wild type,  $\Delta ire1$  and  $\Delta hac1$  cells were grown in presence or absence of 1  $\mu\text{g/ml}$  tunicamycin and *HAC1* and *HAC1<sup>i</sup>* levels were analyzed with the primer-probe assay shown in C. As expected, *HAC1<sup>i</sup>* levels increased in wild type cells treated with tunicamycin, but no *HAC1<sup>i</sup>* was detected in cells lacking *HAC1* or *IRE1*, confirming the specificity of the RT-qPCR assay.

**Supplementary Figure 3. Clogger-induced growth defects are not due to elevated cell death.** (A-B) Cell viability of wild type,  $\Delta ire1$  and  $\Delta hac1$  cultures expressing either cytosolic DHFR or b2-DHFR was assessed with propidium iodide (PI) staining, subsequent flow cytometry and quantification of the fraction of PI negative cells. Cells in which no ectopic gene was expressed, that were not stained with PI or that were killed by incubation at 70°C for 30 min served as controls (A). Clogger expression does not result in cell death (B).

**Supplementary Figure 4. Cytosolic peroxide levels are not elevated upon clogger expression or in UPR<sup>ER</sup>-deficient cells.** (A) The roGFP2-Tsa2 $\Delta$ C<sub>R</sub> probe reacts with peroxides, which ultimately results in the formation of an intramolecular disulfide bond between two cysteine residues adjacent to the GFP chromophore. This changes the excitation spectrum of roGFP2, which can be measured and used as a proxy for probe oxidation (see Methods for details). (B-C) Wild type and  $\Delta$ *hac1* cells that express either cytosolic or *b*<sub>2</sub>-DHFR (induced for 4.5 h), as well as the roGFP2-Tsa2 $\Delta$ C<sub>R</sub> (constitutively expressed) in the cytosol (B) or in mitochondria (C, Su9- roGFP2-Tsa2 $\Delta$ C<sub>R</sub>) were analyzed in a fluorescence plate reader. Fluorescence of roGFP2 was followed for 4 min before H<sub>2</sub>O<sub>2</sub> was added at final concentration of 0, 10, 50 or 100  $\mu$ M. Responses to the treatment were monitored for 1 h (B) or 1.5 h (C). Probe oxidation (OxD) was calculated from fluorescence intensities obtained by excitation at 405 nm and 490 nm (see Methods for details). (D) For the data shown in b, the 0  $\mu$ M H<sub>2</sub>O<sub>2</sub> baseline was subtracted from the H<sub>2</sub>O<sub>2</sub>-challenged samples and differences in probe oxidation after H<sub>2</sub>O<sub>2</sub> addition was analyzed.

**Supplementary Figure 5. Mitochondrial morphology changes precede ER localization of Oxa1.** (A) The mitochondrial inner membrane protein Oxa1 was genomically tagged with ymNeonGreen, the ER marker Sec63 was tagged with ymScarletI. Confocal fluorescence microscopy was performed after 4.5 h of expression of either *b*<sub>2</sub>-DHFR or cytosolic DHFR. When the clogger was induced, a fraction of Oxa1-ymNeonGreen colocalized with Sec63-ymScarletI. Scale bar, 5 μm. (B) Cells expressing Oxa1-GFP<sup>11</sup> and Oxa1-GFP<sup>1-10</sup> and either cytosolic DHFR or *b*<sub>2</sub>-DHFR were imaged at indicated times after clogger induction with a fluorescence microscope. Clogger-induced changes in mitochondrial morphology were observed 1 hour after induction (yellow arrows), ER localization after 3 hours (red arrows).

**Supplementary Figure 6. A split-GFP assay to assess the subcellular localization of mitochondrial precursor proteins.** (A) The GFP<sup>11</sup> fragment was fused to Oxa1, Om45, Mia40 and Dld1, and the GFP<sup>1-10</sup> reporter was fused to Oxa1 (mitochondrial inner membrane, matrix side), Mia40 (mitochondrial inner membrane, IMS side), Sec63 (ER membrane, cytosolic side) and Ssa1 (cytosol). (B-D) The split-GFP constructs described in panel a were co-expressed with *b*<sub>2</sub>-DHFR or cytosolic DHFR and fluorescence was measured with a plate reader after 4.5 h of galactose induction. Under non-stressed conditions (expression of cytosolic DHFR), the split-GFP signals recapitulated the known localizations of Oxa1, Om45, Mia40 and Dld1. Under mitoprotein-induced stress (*b*<sub>2</sub>-DHFR expression), Om45-GFP<sup>11</sup> also evoked a fluorescence signal when combined with Sec63-GFP<sup>1-10</sup> and Ssa1-GFP<sup>1-10</sup>, indicating accumulation at the cytosolic side of the ER membrane. (E) Fluorescence microscopy of cells expressing Oxa1-GFP<sup>11</sup> and Oxa1-GFP<sup>1-10</sup> (left) or Oxa1-GFP<sup>11</sup> and Sec63-GFP<sup>1-10</sup> (right) and either *b*<sub>2</sub>-DHFR or cytosolic DHFR after 4.5 h of induction. Scale bar, 5 μm. (F) WT,  $\Delta$ *doa10*,  $\Delta$ *hac1* and  $\Delta$ *vos9* cells expressing Oxa1-GFP<sup>11</sup> and Sec63-GFP<sup>1-10</sup> were cultured with either 0 or 50 μM carbonyl cyanide m-chlorophenylhydrazone (CCCP) for 16 h and fluorescence was measured.

**Supplementary Figure 7. Certain mitochondrial proteins are constitutively synthesized close to the ER surface.** (A) Data from (Fazal *et al.*, 2019) on the subcellular distribution of mRNA in HEK293T cells. The biotin ligase APEX2 was localized to the ER or mitochondria and biotinylated mRNAs were purified and sequenced (APEX-Seq). For all mitochondrial proteins in the dataset, the  $\log_2$  enrichment of mRNAs at the ER membrane (ERM-APEX2) and the mitochondrial outer membrane (OMM-APEX2) over the total mRNAs are shown. While most mRNAs localize to the mitochondrial membrane, some transcripts are also enriched near the ER surface. (B) Potential glycosylation sites in the Oxa1 sequence were predicted with the NetNGlyc 1.0 Server (Gupta and Brunak, 2002). Underlined motifs are predicted to be luminal if Oxa1 was inserted into the ER membrane (Weill *et al.*, 2019a). (C) Lysates from cells expressing *GAL-Oxa1-HA* and either cytosolic DHFR or *b<sub>2</sub>-DHFR* for 4.5 hours were treated with EndoH and analyzed by Western blotting against the HA tag on Oxa1 alongside untreated lysates. The EndoH-sensitive band (asterisk) denotes a glycosylated form of Oxa1. p, unmodified precursor form of Oxa1, m, mature Oxa1. (D) Quantification of EndoH-sensitive bands from  $n=3$  Western Blots against Oxa1-HA in cells expressing either cytosolic DHFR or *b<sub>2</sub>-DHFR*. The fraction of glycosylated Oxa1 increases with clogger expression, but is already present under physiological conditions.



**Supplementary Figure 8. The UPR<sup>ER</sup> is required for efficient growth upon metabolic switches and mitoprotein-induced stress.** (A) Maximum growth rate  $r$  of the cultures shown in Figure 5B. (B-C) Maximum capacity  $k$  and maximum growth rate  $r$  of the cultures shown in Figure 5E.  $p$  values for pairwise comparisons with a significant difference ( $p < 0.05$ ) are shown. (D) Schematic depiction of the LexA-ER expression system used to express  $HACI^i$  independently of the clogger. Upon binding of  $\beta$ -estradiol to the estrogen receptor domain, the transcription factor LexA-ER-AD binds to lexO elements upstream of the  $HACI^i$  ORF and stimulates its transcription. (E) Wild type cells and cells that express  $HACI^i$  from a lexO promoter driven by the  $\beta$ -estradiol-inducible artificial transcription factor LexA-ER-AD were grown to log phase in lactate medium. Clogger expression was induced by addition of 0.5% galactose and at the same time, the media were supplemented with the indicated concentration of  $\beta$ -estradiol. Ectopic expression of low levels of  $HACI^i$  did not result in better growth of clogger-expressing cells. (F) Maximum growth rate  $r$  of the cultures shown in Panel E.

## **Supplementary Tables**

**Supplementary Table 1.** Yeast strains used in this study.

**Supplementary Table 2.** Plasmids used in this study.

**Supplementary Table 3.** Primers used in this study.

**Supplementary Table 4.** Numerical source data for all experiments.

**Supplementary Table 5.** Ribosome profiling data.

**A****Proteins upregulated after 4.5 h - Molecular function**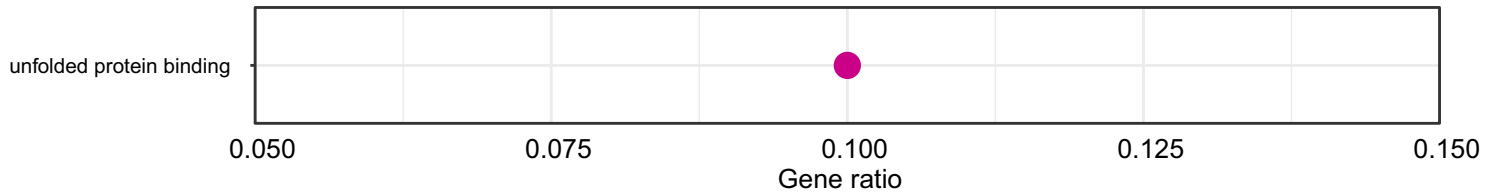**B****Proteins upregulated after 9 h - Molecular function**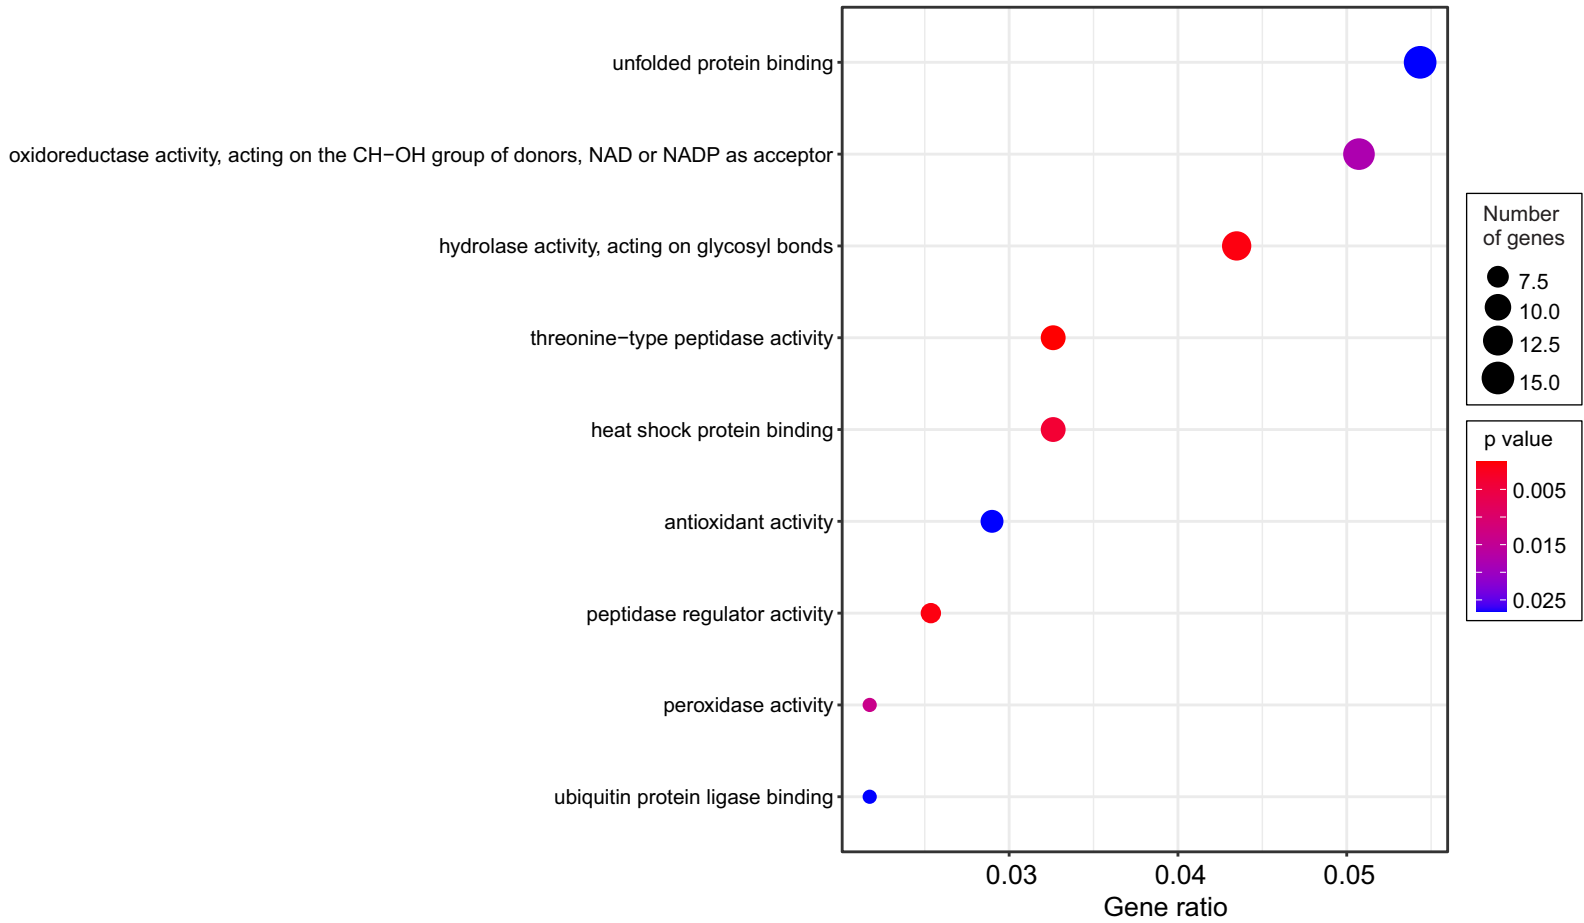



**A**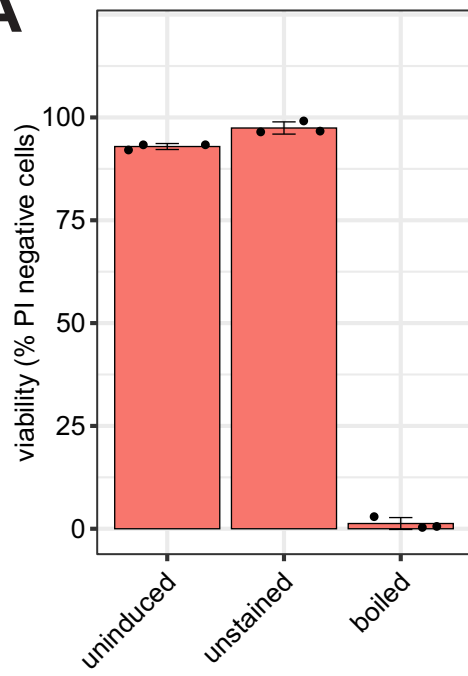**B**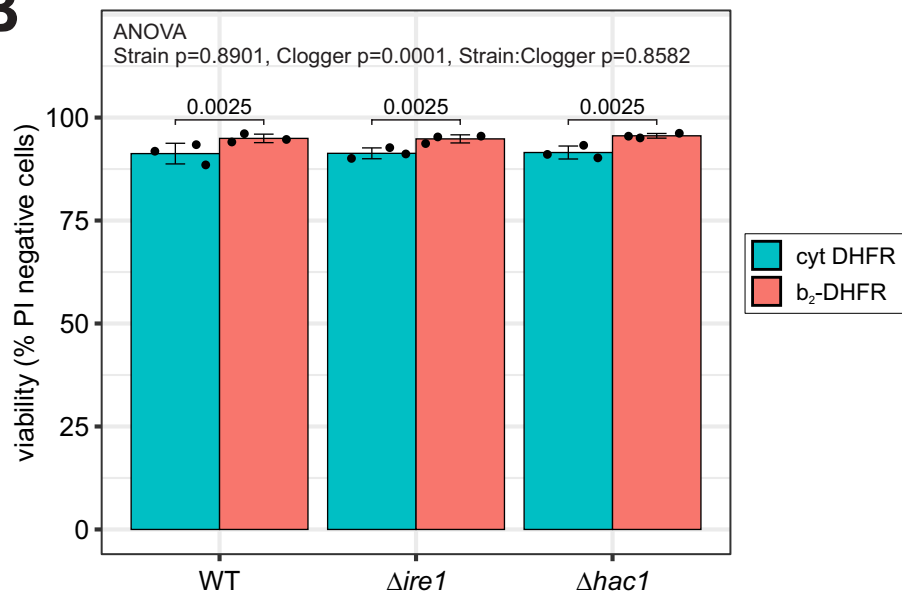

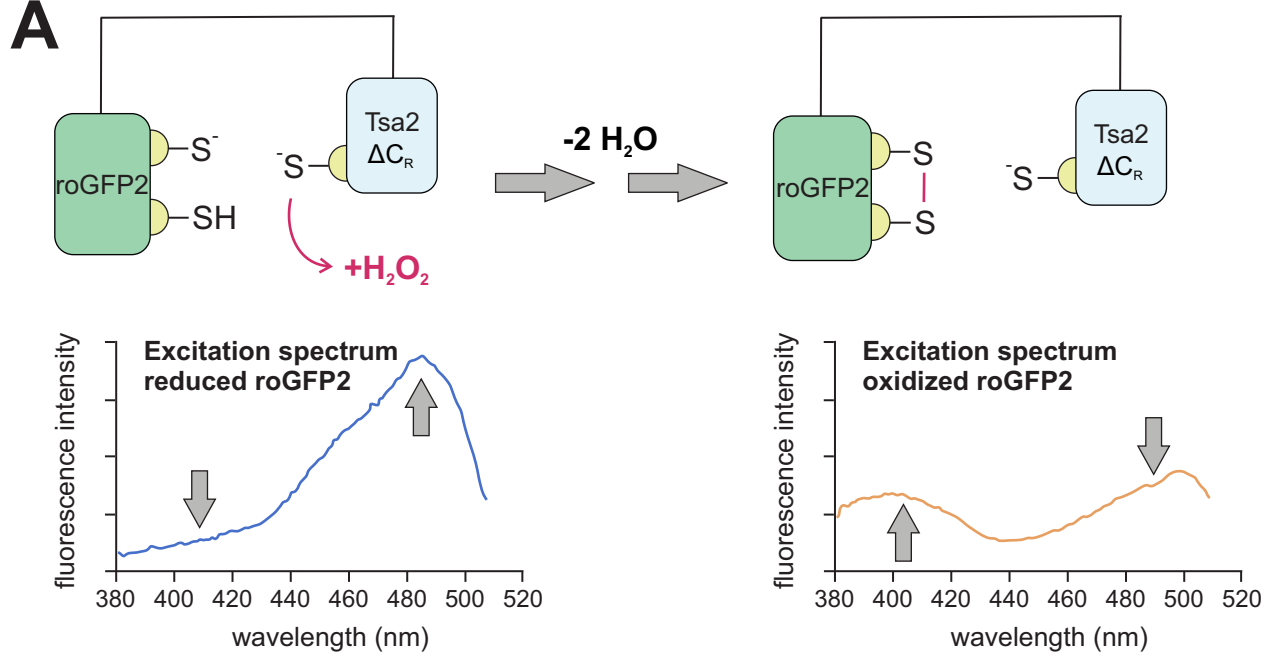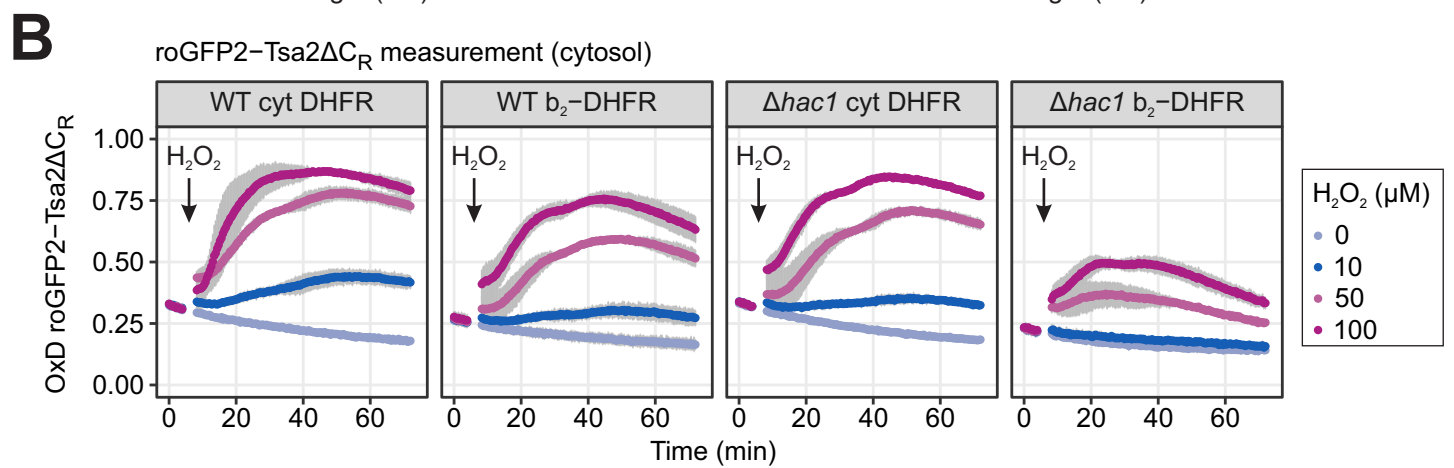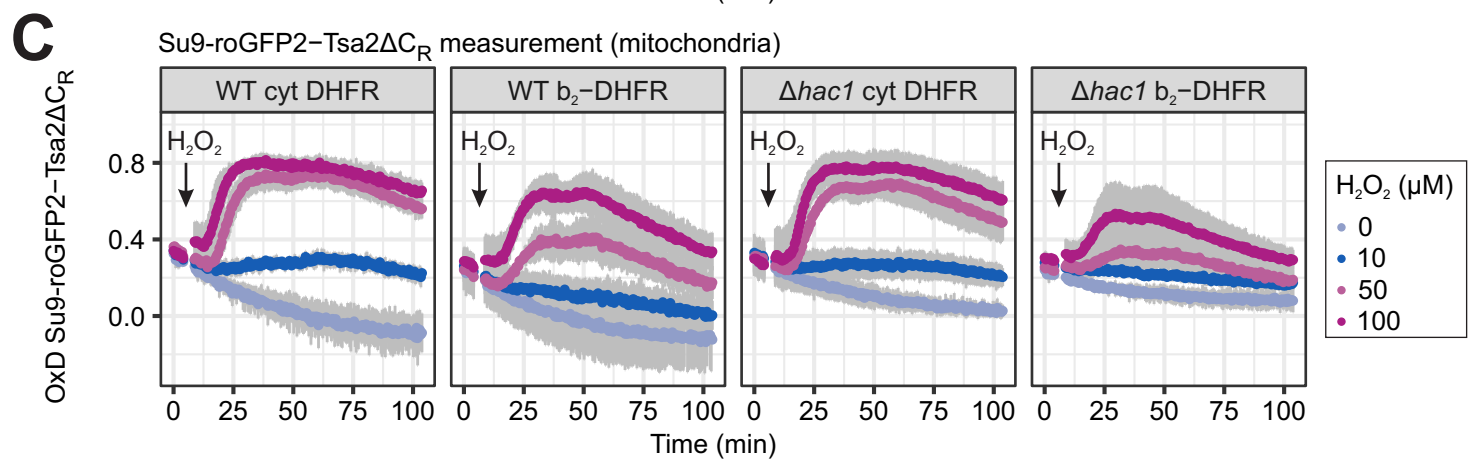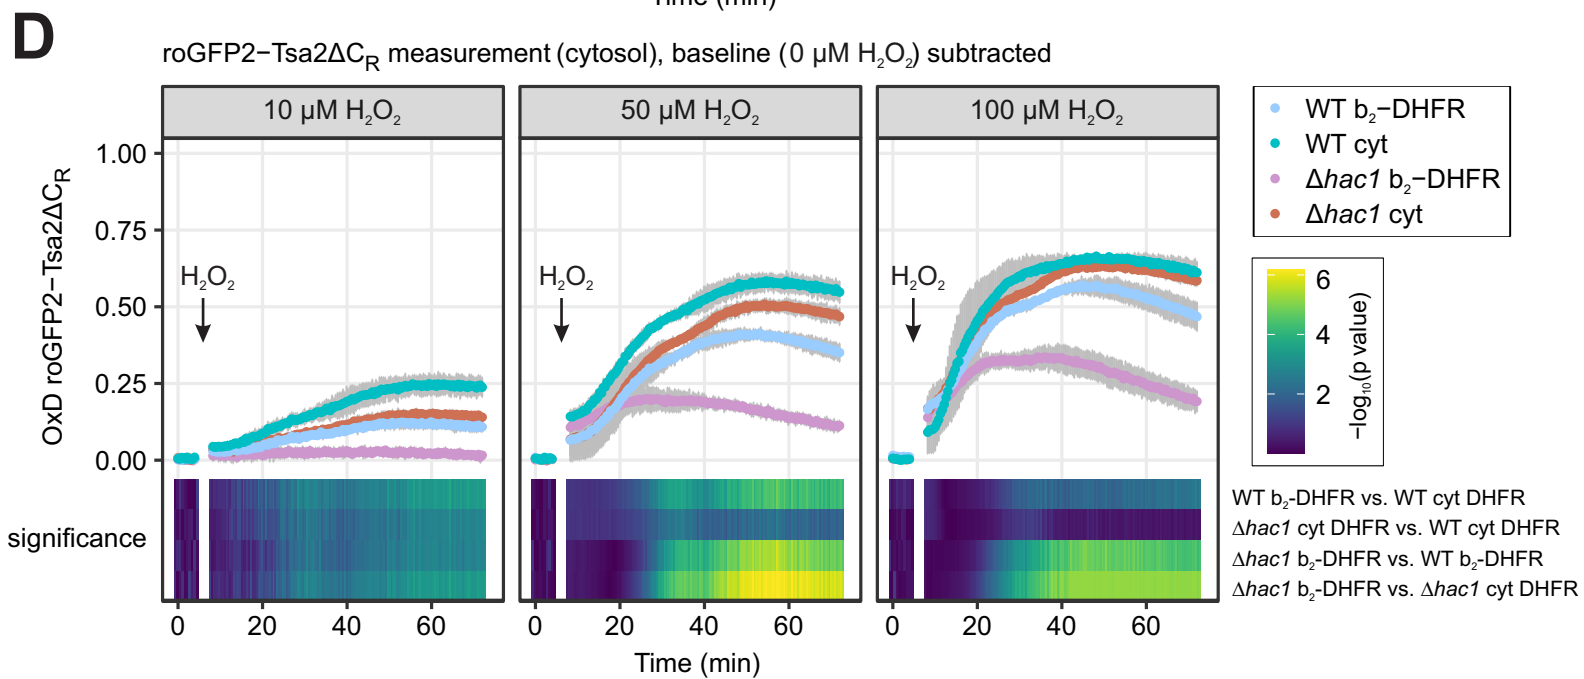

**A**Sec63-  
ymScarlet1Oxa1-  
ymNeonGreen

merge

brightfield

cyt DHFR

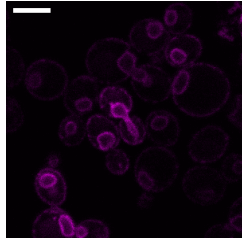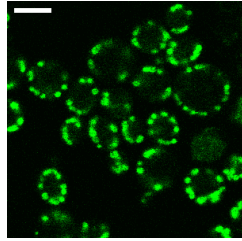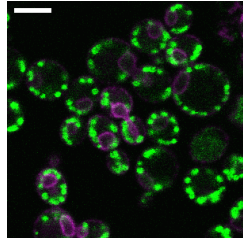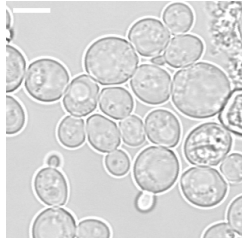b<sub>2</sub>-DHFR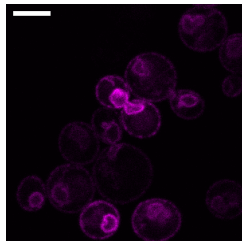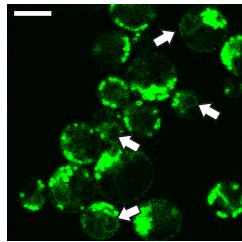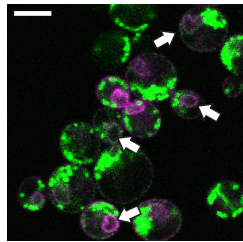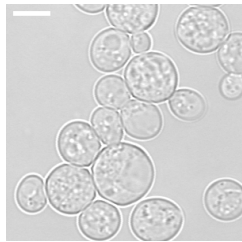**B**

cyt DHFR

b<sub>2</sub>-DHFR

brightfield

Oxa1

brightfield

Oxa1

0 h

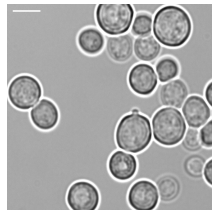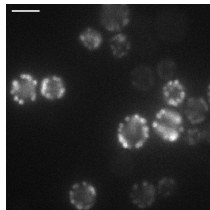

0 h

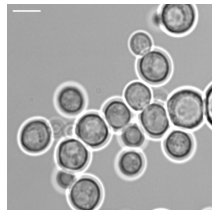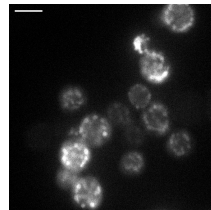

1 h

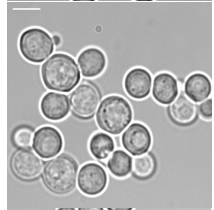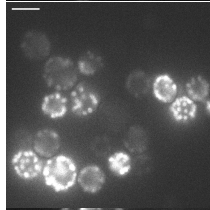

1 h

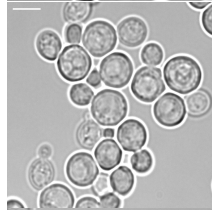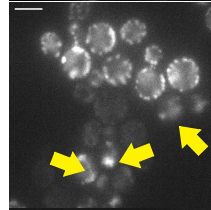

2 h

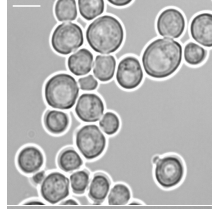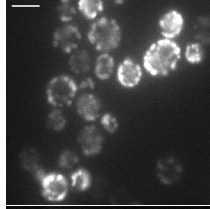

2 h

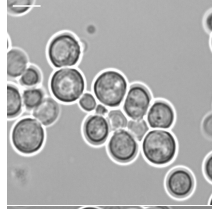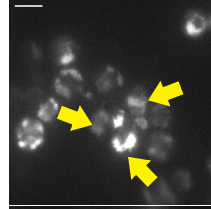

3 h

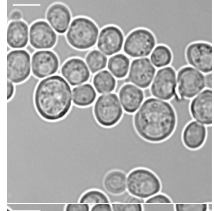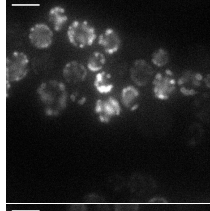

3 h

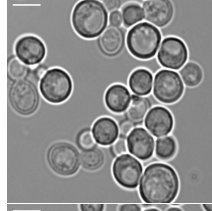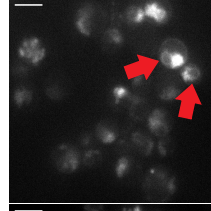

4.5 h

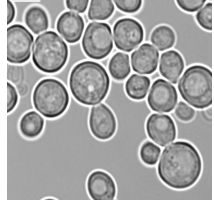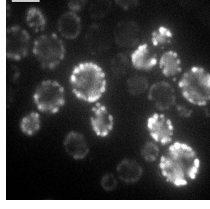

4.5 h

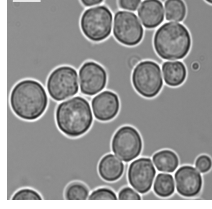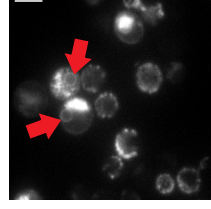

induction (0.5% galactose)

induction (0.5% galactose)

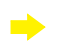

altered mitochondrial morphology

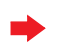

ring-shaped ER structure

**A**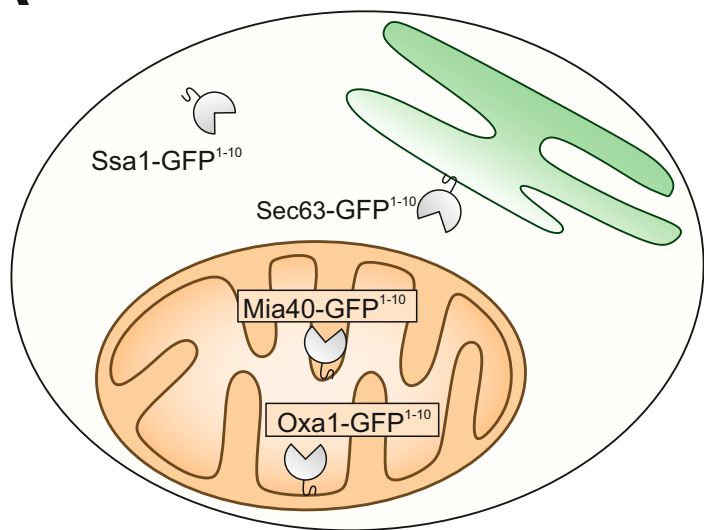**B**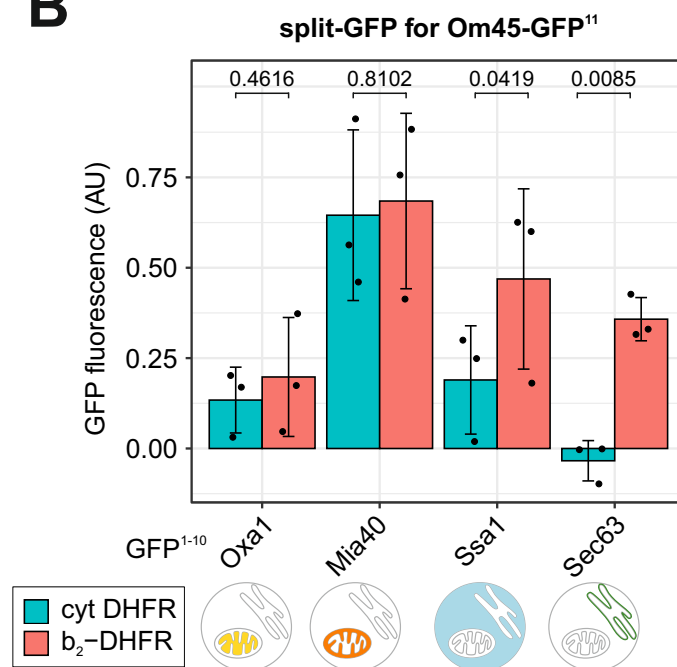**C**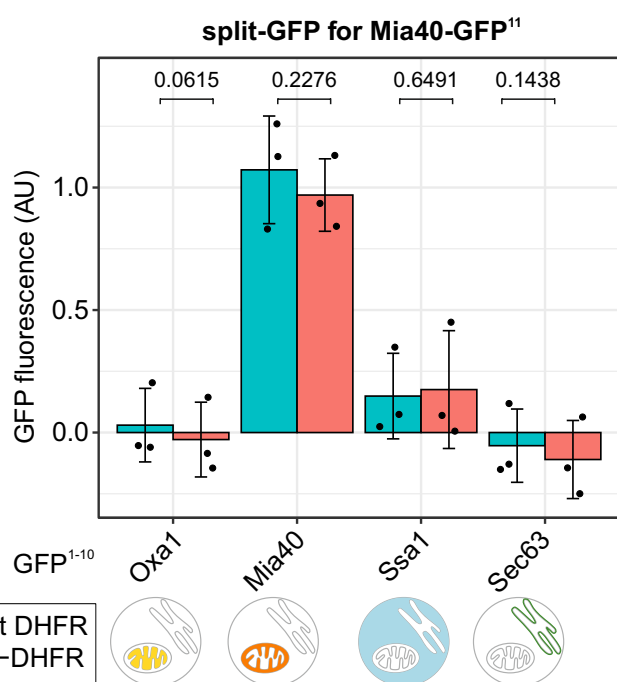**D**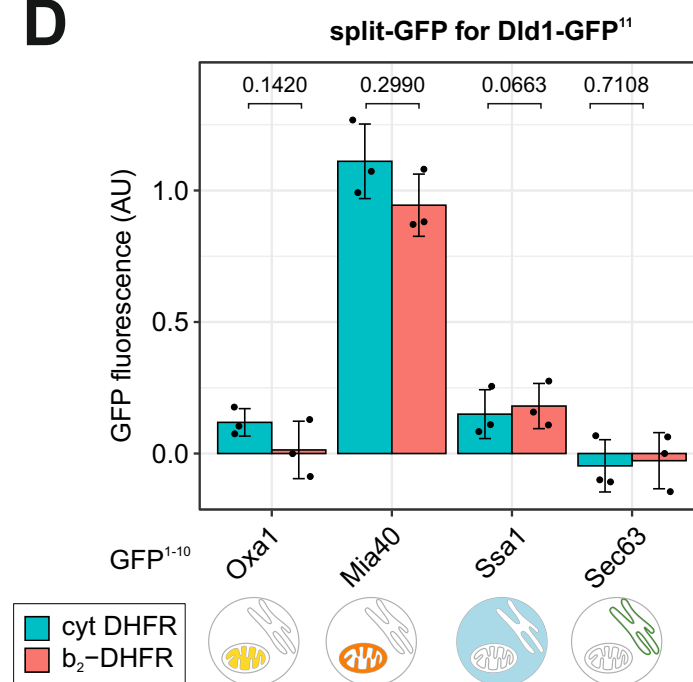**E**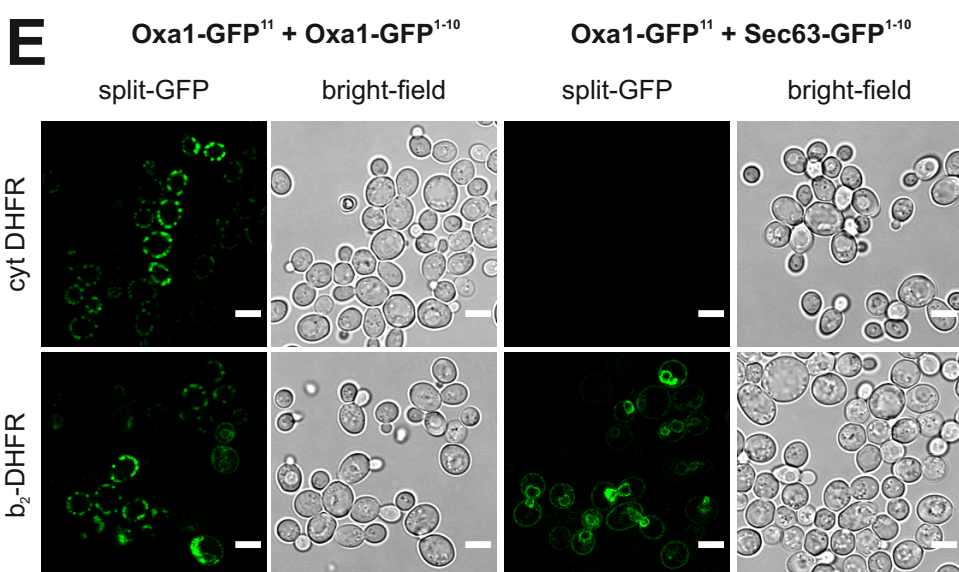**F**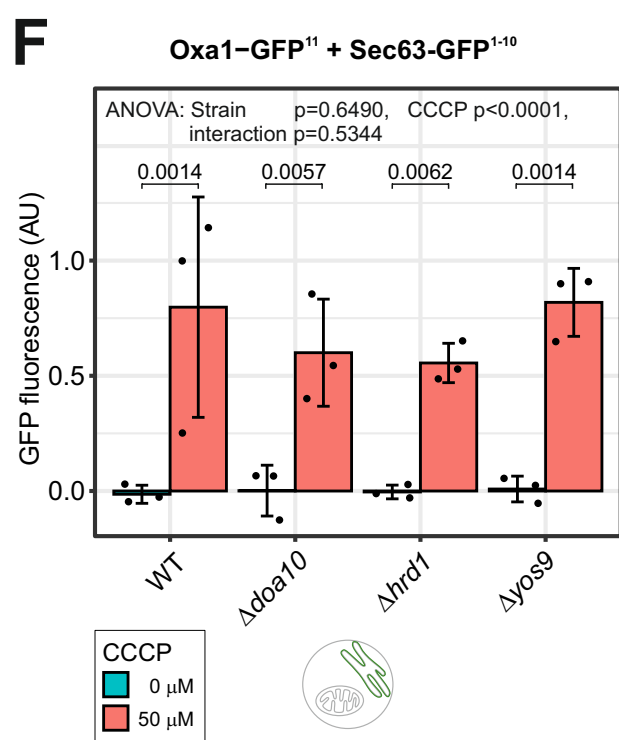



**A** proximity-labeling of transcripts in HEK293T cells at mitochondrial and ER surface (Fazal et al. 2019)

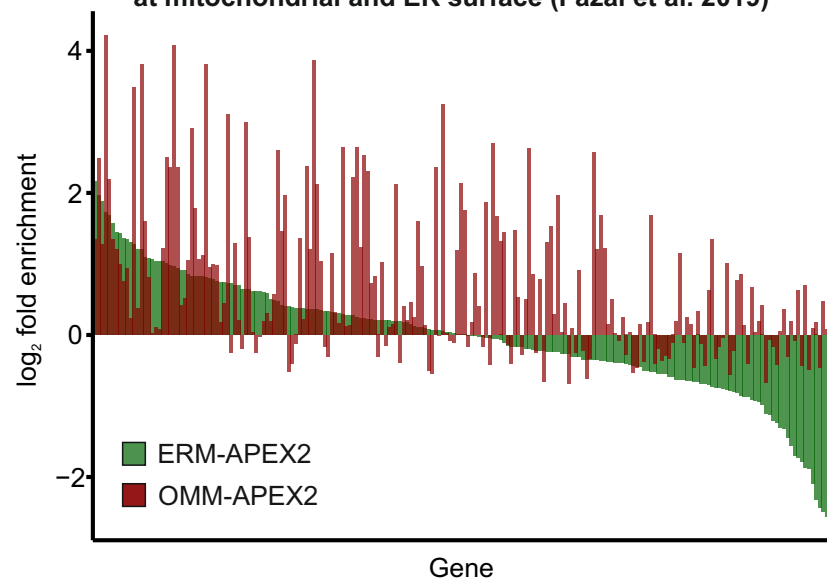

**B**

Oxa1

```

1 MFKLT SRLVTSRFAASSRLATARTIVLPRPHPSWISFQAK
41 RFNSTGPNANDVSEIQTLPSIDELTSSAPLSASTSDLI
81 ANTTQTVGELSSHIGYLNISGLAQTWYWPSDIIQHVLEAV
121 HVYSGLPWWGTIAATLILIRCLMFLYVKSSDTVARNSHI
161 KPELDALNNKLMSTDLQOQQLVAMQRKKLLSSHGIKNRW
201 LAAPMLQIPIALGFFNALRHMANYPVDGFANQGVAVFTDL
241 TQADPYLGLQVITAAVFISFTRLGGETGAQQFSSPMKRLF
281 TILPIISIPATMNLSSAVVLYFAFNGAFSVLQTMILRNKW
321 VRSKLKITEVAKPRTP IAGASPTENMGIFQSLKHNIQKAR
361 DQAERRQLMQDNEKKLQESFKEKRQNSKIKIVHKSNFINN
401 KK
    
```

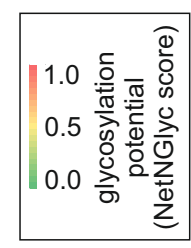

**C**

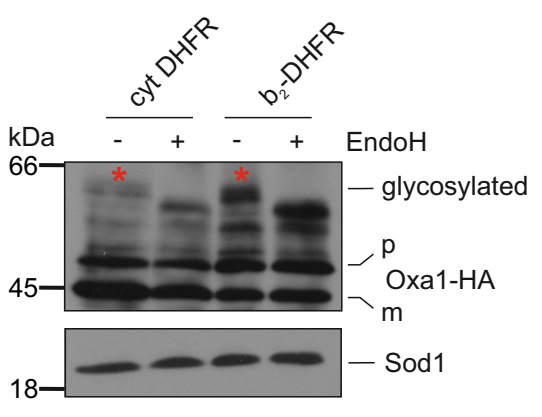

**D**

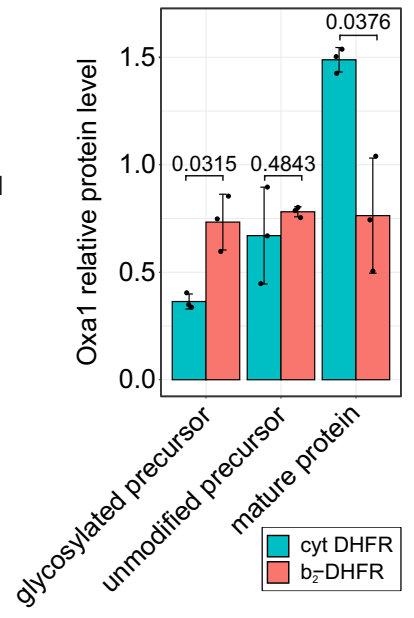

**A**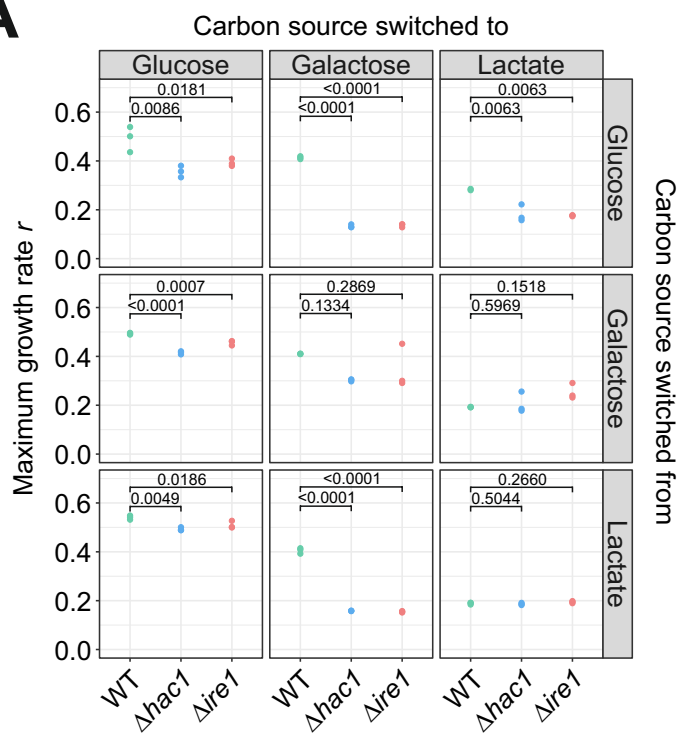**B**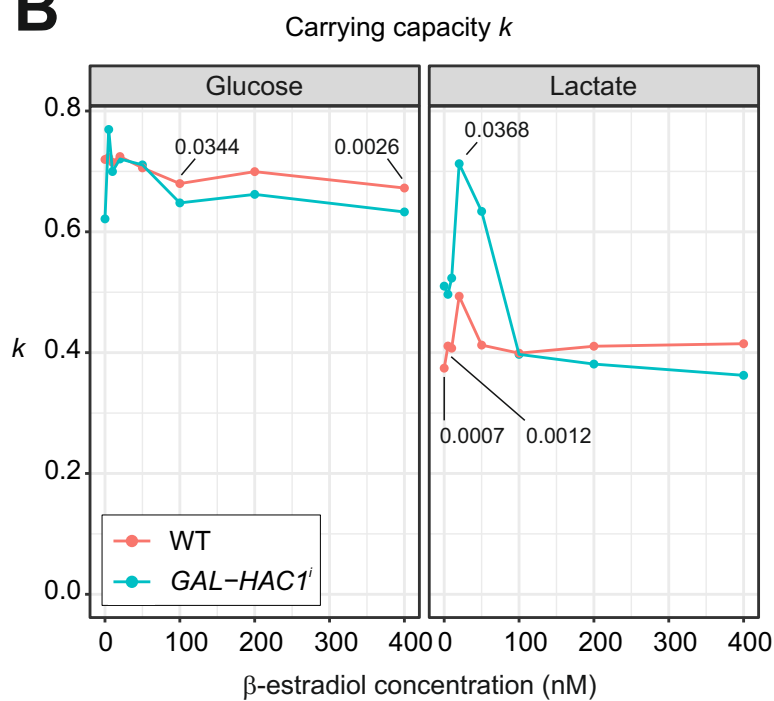**C**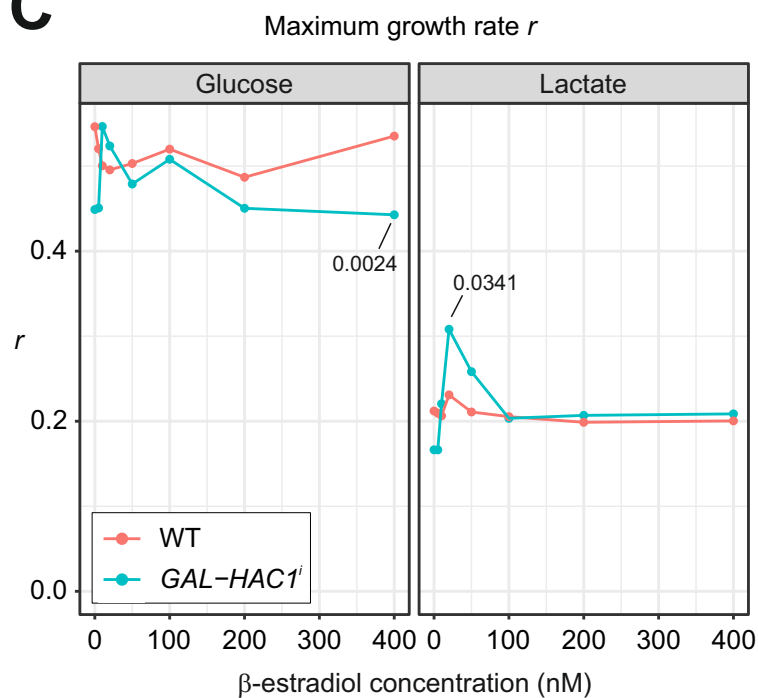**D**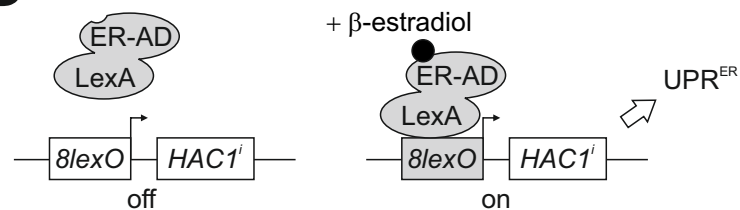**F**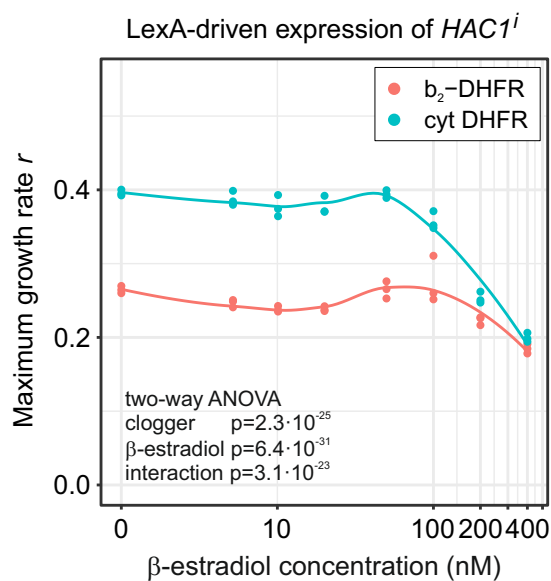**E**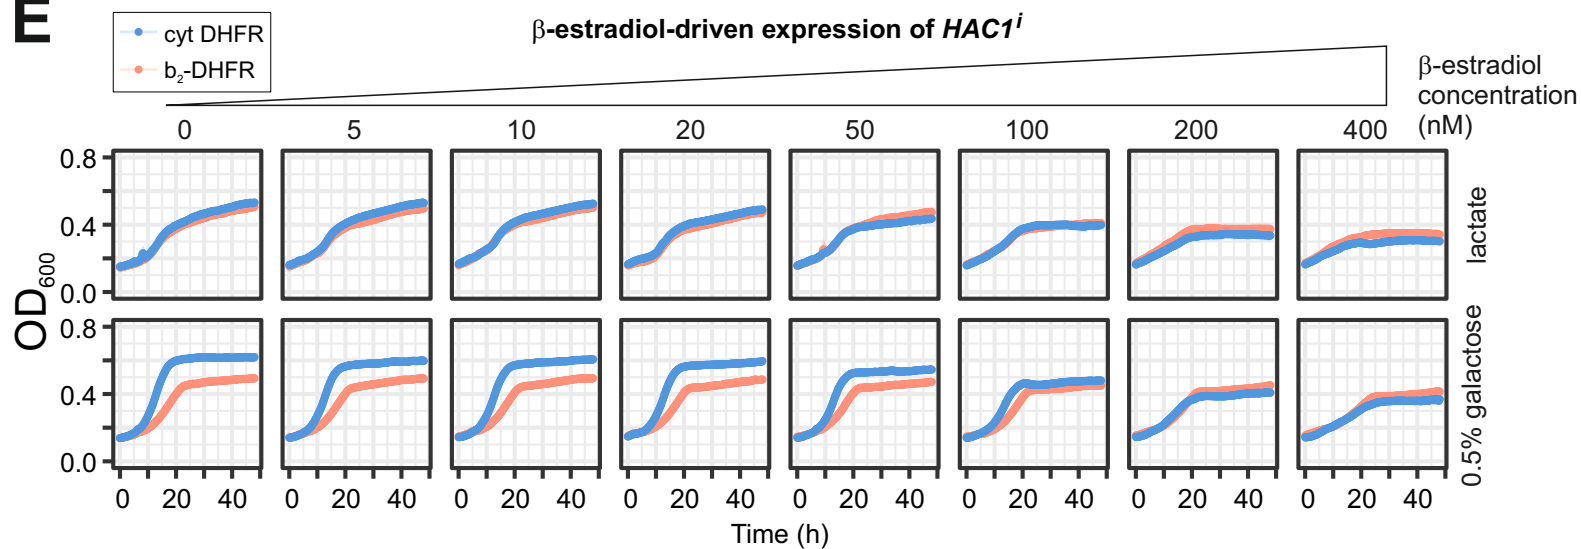

# Figure 1B Original Data

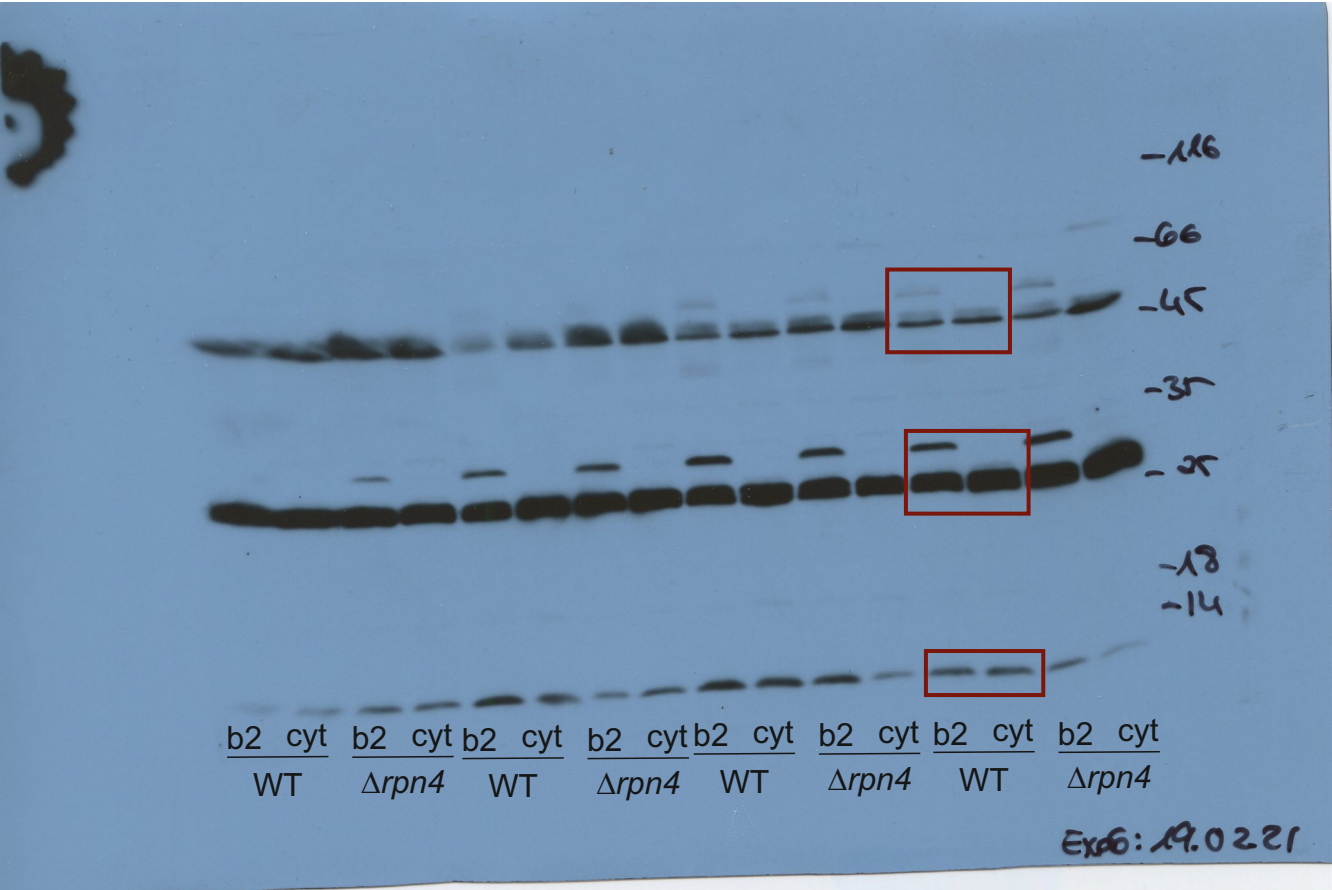

# Supplementary Figure 7C Original Data

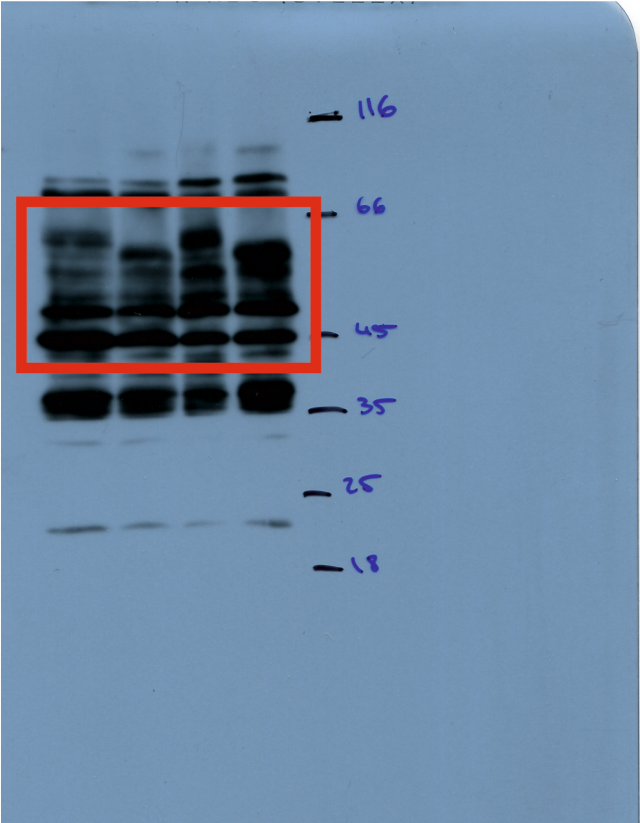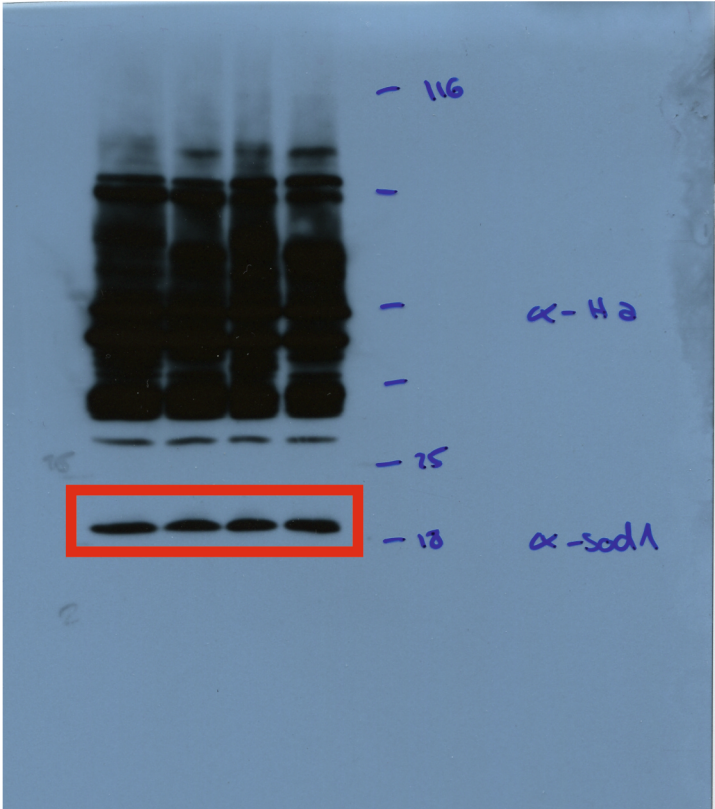

The films show two different exposures of the same Western Blot
