# Supplementary material for: The unfolded protein response of the endoplasmic reticulum supports mitochondrial biogenesis by buffering nonimported proteins
Source: PubMed Central journal article supplement — Mol Biol Cell. 2023 Aug 17;34(10):ar95. doi: 10.1091/mbc.E23-05-0205 (PMC10551703; doi:10.1091/mbc.e23-05-0205), 2023-08-17
Supplement: mbc-34-ar95-s002.pdf [file mbc-34-ar95-s002.pdf]

# The unfolded protein response of the endoplasmic reticulum supports mitochondrial biogenesis by buffering non-imported proteins

Katharina Knöringer, Carina Groh, Lena Krämer, Kevin Stein, Katja Hansen, Jannik Zimmermann, Bruce Morgan, Johannes Herrmann, Judith Frydman, and Felix Boos

*Corresponding author(s): Felix Boos, Stanford University*

---

## Review Timeline:

|                     |            |
|---------------------|------------|
| Submission Date:    | 2023-05-31 |
| Editorial Decision: | 2023-06-05 |
| Revision Received:  | 2023-06-14 |
| Accepted:           | 2023-06-19 |

---

*Editor-in-Chief: Matthew Welch*

## Transaction Report:

(Note: With the exception of the correction of typographical or spelling errors that could be a source of ambiguity, letters and reports are not edited. The original formatting of letters and referee reports may not be reflected in this compilation.)

RE: Manuscript #E23-05-0205

TITLE: "The unfolded protein response of the endoplasmic reticulum supports mitochondrial biogenesis by buffering non-imported proteins"

Dear Dr. Boos,

Thank you for submitting your manuscript and associated materials for consideration for our special issue on Protein Quality Control. I've thoroughly read the reviewers' comments, your responses and the revised manuscript and would be happy to accept a revised version with changes as outlined in the latest rebuttal letter. For editorial clarity, here are the specific points I consider most important.

1. The ER localisation of endogenous Oxa1 is very hard to see and to my mind detracts from the strong split-GFP experiments. I suggest you move Figure 3a to the supplement.
2. I like the DTT halo assay and suggest you retain it in the main manuscript. I suggest delineating the region of increased growth with a square bracket rather than the arrow, which is a bit vague. A square bracket spanning the width of the growth ring should highlight the region better for readers not familiar with halo assays.
3. I suggest you include the R4 experiment that shows Hac1i expression doesn't rescue clogger-associated growth defects. I think this is wise for the sake of transparency. My conclusion is that UPR-ER is already induced in these cells, so any protective effect is already there. Adding additional Hac1 doesn't further rescue. This could be as a supplement, but I think the data are nice.
4. I'm agnostic on the EndoH experiment - perhaps it's wise to move it to the supplement as both remaining critical reviewers suggest.

Sincerely,  
Elizabeth Miller  
Monitoring Editor  
Molecular Biology of the Cell

-----  
Dear Dr. Boos,

The review of your manuscript, referenced above, is now complete. The Monitoring Editor has decided that your manuscript requires minor revisions before it can be published in Molecular Biology of the Cell, as described in the Monitoring Editor's decision letter above and the reviewer comments (if any) below.

A reminder: Please do not contact the Monitoring Editor directly regarding your manuscript. If you have any questions regarding the review process or the decision, please contact the MBoC Editorial Office ([mboc@ascb.org](mailto:mboc@ascb.org)).

When submitting your revision include a rebuttal letter that details, point-by-point, how the Monitoring Editor's and reviewers' comments have been addressed. (The file type for this letter must be "rebuttal letter"; do not include your response to the Monitoring Editor and reviewers in a "cover letter.") Please bear in mind that your rebuttal letter will be published with your paper if it is accepted, unless you have opted out of publishing the review history.

Authors are allowed 15 days to submit a revision. If this time period is inadequate, please contact us immediately at [mboc@ascb.org](mailto:mboc@ascb.org).

In preparing your revised manuscript, please follow the instruction in the Information for Authors ([www.molbiolcell.org/info-for-authors](http://www.molbiolcell.org/info-for-authors)). In particular, to prepare for the possible acceptance of your revised manuscript, submit final, publication-quality figures with your revision as described.

To submit the rebuttal letter, revised version, and figures, please use this link (please enable cookies, or cut and paste URL):  
Link Not Available

MBoC offers the option to publish your work with immediate open access. Open access can increase the discoverability and usability of your research. If you would like to publish your paper with immediate open access but did not select this option during initial submission, please contact us at [mboc@ascb.org](mailto:mboc@ascb.org).

Authors of Articles and Brief Communications whose manuscripts have returned for minor revision ("revise only") are encouraged to create a short video abstract to accompany their article when it is published. These video abstracts, known as Science Sketches, are up to 2 minutes long and will be published on YouTube and then embedded in the article abstract. Science Sketch Editors on the MBoC Editorial Board will provide guidance as you prepare your video. Information about how to prepare and submit a video abstract is available at [www.molbiolcell.org/science-sketches](http://www.molbiolcell.org/science-sketches). Please contact [mboc@ascb.org](mailto:mboc@ascb.org) if you are interested in creating a Science Sketch.

Thank you for submitting your manuscript to MBoC. Please do not hesitate to contact this office if you have any questions.

Sincerely,

Eric Baker  
Journal Production Manager  
MBoC Editorial Office  
[mbc@ascb.org](mailto:mbc@ascb.org)

---



## Point-by-point response to the reviewers' comments

1. The ER localisation of endogenous Oxa1 is very hard to see and to my mind detracts from the strong split-GFP experiments. I suggest you move Figure 3a to the supplement.

We moved this Figure panel to the supplements as requested (now Supplementary Figure 5A).

2. I like the DTT halo assay and suggest you retain it in the main manuscript. I suggest delineating the region of increased growth with a square bracket rather than the arrow, which is a bit vague. A square bracket spanning the width of the growth ring should highlight the region better for readers not familiar with halo assays.

As suggested, we have retained this figure panel in the main manuscript and delineated the region of interest by a square bracket to make it easier to see.

3. I suggest you include the R4 experiment that shows Hac1i expression doesn't rescue clogger-associated growth defects. I think this is wise for the sake of transparency. My conclusion is that UPR-ER is already induced in these cells, so any protective effect is already there. Adding additional Hac1 doesn't further rescue. This could be as a supplement, but I think the data are nice.

We have included these data now as Supplementary Figure 5E, alongside a schematic depiction of the expression system used (Supplementary Figure 5D) and statistical analysis of the data (Supplementary Figure 5F). We have included a description and interpretation of the data in the results section of the manuscript (lines 330-333).

4. I'm agnostic on the EndoH experiment - perhaps it's wise to move it to the supplement as both remaining critical reviewers suggest.

We have moved the figure panel to the supplement as suggested (now Supplementary Figure 7C). We have also performed topology prediction on Oxa1 to assess whether the potential glycosylation sites are likely to be exposed to the ER lumen (when localized to the ER) and found agreement of all nine prediction algorithms for luminal localization of the first two glycosylation sites. We have visually highlighted this in Supplementary Figure 7B and explained the prediction method in the Methods section.

RE: Manuscript #E23-05-0205R

TITLE: "The unfolded protein response of the endoplasmic reticulum supports mitochondrial biogenesis by buffering non-imported proteins"

Dear Dr. Boos:

I am pleased to accept your manuscript for publication in Molecular Biology of the Cell.

Sincerely,  
Elizabeth Miller  
Monitoring Editor  
Molecular Biology of the Cell

-----  
Dear Dr. Boos:

Congratulations on the acceptance of your manuscript! Thank you for choosing to publish your work in Molecular Biology of the Cell (MBoC).

Within 10 days, an unedited PDF of your manuscript will be published on MBoC in Press, an early release version of the journal. The date your manuscript appears on this site is the official publication date.

Your copyedited and typeset manuscript will be scheduled for publication in the next available issue of MBoC. Our production team will notify you when the page proofs of your paper are ready for your review.

MBoC offers the option to publish your paper with immediate open access. Open access can increase the discoverability and usability of your research. If you would like to publish your paper with immediate open access but did not select this option during initial submission, please contact the MBoC Editorial Office ([mbc@ascb.org](mailto:mbc@ascb.org)).

We invite you to submit images related to your accepted manuscript to be considered for the journal cover. Please contact [mboc@ascb.org](mailto:mboc@ascb.org) to learn how to submit candidate cover images.

Authors of Articles and Brief Communications are also encouraged to create a short video abstract to accompany their article when it is published. These video abstracts, known as Science Sketches, are up to 2 minutes long and will be published on YouTube and then embedded in the article abstract. Science Sketch Editors on the MBoC Editorial Board will provide guidance as you prepare your video. Information about how to prepare and submit a video abstract is available at [www.molbiolcell.org/science-sketches](http://www.molbiolcell.org/science-sketches). Please contact [mboc@ascb.org](mailto:mboc@ascb.org) if you are interested in creating a Science Sketch.

We look forward to publishing your paper in MBoC.

Sincerely,

Eric Baker  
Journal Production Manager  
MBoC Editorial Office  
[mbc@ascb.org](mailto:mbc@ascb.org)

-----
